# Supplementary material
Source: publisher site journal article supplement (https://www.dovepress.com/article/269586)
Supplement: Supplementary file 1 [file get_supplementary_file.php]

# Supplementary material: Patient questionnaire

## 1 / GOAL Survey questionnaire

### PATIENT

Date of visit: |\_|\_|/|\_|\_|/|\_|\_|\_|\_|

Gender:  Male  Female

Age:  18-39  40-49  50-59  60-69  70-79  +80

### OPHTHALMOLOGICAL HISTORY

#### HISTORY

Cataract surgery  Glaucoma surgery  Refractive surgery

Ocular surface surgery  Other relevant ocular pathology, specify:.....  Diabetes

Autoimmune disease: .....  Other relevant systemic disease, specify:.....

#### TYPE OF GLAUCOMA

Glaucoma or ocular hypertension diagnosed on: |\_|\_|\_|\_| (year)

**PRIMARY**  Open angle (High and low tension)  Pigmentary

Angle closure  Exfoliative

Congenital  Others, specify: .....

**SECONDARY**

| RE:  _ _  mmHg           | IOP ASSESSMENT              | LE:  _ _  mmHg           |
|--------------------------|-----------------------------|--------------------------|
| RE                       | STAGE OF GLAUCOMA           | LE                       |
| <input type="checkbox"/> | Ocular hypertension         | <input type="checkbox"/> |
| <input type="checkbox"/> | Early glaucoma (< 6 dB)     | <input type="checkbox"/> |
| <input type="checkbox"/> | Moderate glaucoma (6-12 dB) | <input type="checkbox"/> |
| <input type="checkbox"/> | Severe glaucoma (>12 dB)    | <input type="checkbox"/> |

### TREATMENTS

#### ON GOING TREATMENT

start: (months) |\_|\_| (year) |\_|\_|\_|\_|

#### PREVIOUS TREATMENTS

Did the patient take other glaucoma treatments in the past?  yes  no

Date of the first glaucoma treatment: |\_|\_|\_|\_| (year)

How many times did he change the treatment? |\_|\_| (times)

Tick the appropriate boxes (Multiple answers allowed):

| TREATMENT                                                     | ON GOING |    |    |    | PREVIOUS |    |    |    |
|---------------------------------------------------------------|----------|----|----|----|----------|----|----|----|
|                                                               | RE       |    | LE |    | RE       |    | LE |    |
|                                                               | P        | PF | P  | PF | P        | PF | P  | PF |
| Bimatoprost 0.01%                                             |          |    |    |    |          |    |    |    |
| Bimatoprost 0.03%                                             |          |    |    |    |          |    |    |    |
| Latanoprost                                                   |          |    |    |    |          |    |    |    |
| Tafuprost                                                     |          |    |    |    |          |    |    |    |
| Travoprost                                                    |          |    |    |    |          |    |    |    |
| Latanoprost + Timolol                                         |          |    |    |    |          |    |    |    |
| Travoprost + Timolol                                          |          |    |    |    |          |    |    |    |
| Bimatoprost + Timolol                                         |          |    |    |    |          |    |    |    |
| Beta-blocker                                                  |          |    |    |    |          |    |    |    |
| Fixed combination Carbonic anhydrase inhibitor / Beta-blocker |          |    |    |    |          |    |    |    |
| Carbonic anhydrase inhibitor                                  |          |    |    |    |          |    |    |    |
| Alpha 2 agonist                                               |          |    |    |    |          |    |    |    |
| Fixed combination Alpha 2 agonist / Beta-blocker              |          |    |    |    |          |    |    |    |
| Other glaucoma treatment, specify: .....                      |          |    |    |    |          |    |    |    |

RE= Right Eye; LE= Left Eye; P= Preserved, PF= Preservative free

If the patient changed his glaucoma treatment, what was the reason? (Multiple answers allowed)

Insufficient efficacy  Local intolerance  Systemic intolerance

Patient's request  Insufficient compliance  Other, please specify:.....
